# Supplementary material
Source: Springer Nature journal article supplement (https://www.springermedizin.de/resource/supplementary/12884_2007_16_MOESM1_ESM.pdf/9459758)
Supplement: MOESM1 [file 9459758]

**1629 women  
identified from original  
CPC cohort**

**1147 contactable**

**482 not contactable**

**791 completed  
study**

**356 did not complete  
study**

- 92 refusals
- 258 max attempts reached
- 3 away for study
- 1 incomplete interview
- 2 family crisis/illness

**6 not eligible**

- 2 still born
- 1 adoption
- 3 other

**476 bad  
phone number**

- 203 not in service
- 5 line trouble
- 30 business/fax number
- 238 not at this number

**791/1147 =  
69% Participation**
